# Supplementary material for: Microbial Contamination in Next Generation Sequencing: Implications for Sequence-Based Analysis of Clinical Samples
Source: PLoS Pathog. 2014 Nov 20;10(11):e1004437. doi: 10.1371/journal.ppat.1004437 (PMC4239086; doi:10.1371/journal.ppat.1004437)
Supplement: File S1 — TCGA datasets. (XLS) [file ppat.1004437.s010.xls]

## Sheet: BRCA
Outlier	Sample	Run
	A2-A0CS	SRR327857
	A2-A0CW	SRR327924
	A2-A0YC	SRR327802
	A2-A0YI	SRR327738
	A7-A0CD	SRR328229
Yes	A7-A0CJ	SRR328259
	A8-A06O	SRR328261
	A8-A06T	SRR328231
	A8-A06U	SRR328291
	A8-A07W	SRR328220
Yes	A8-A07Z	SRR328217
	A8-A09B	SRR328170
Yes	A8-A09E	SRR328114
	A8-A079	SRR328320
	A8-A090	SRR328202
	A8-A099	SRR328172
	AN-A0FK	SRR328065
	AN-A03Y	SRR328193
	AN-A046	SRR328195
	AN-A049	SRR328140
	AO-A0J3	SRR328095
	AO-A12B	SRR327906
	AR-A0TR	SRR327909
	AR-A0TV	SRR327983
	B6-A0IB	SRR327832
	BH-A0E7	SRR328041
	BH-A0EB	SRR327827
	BH-A0GZ	SRR328043
	BH-A0HB	SRR327972
	BH-A0HI	SRR328045
	BH-A0HQ	SRR327776
	BH-A0W3	SRR325269
	E2-A10A	SRR327889
	A2-A0EN	SRR328074
	A2-A0ES	SRR327999
	A2-A0EW	SRR328003
	A2-A0EX	SRR327926
	A2-A0SY	SRR327799
	A2-A0T4	SRR327781
	A2-A0T6	SRR327801
	A2-A0YD	SRR327760
	A2-A0YL	SRR327739
	A8-A0A1	SRR328166
	A8-A0A2	SRR328138
	A8-A0A4	SRR328167
	A8-A0A6	SRR327914
	A8-A0A7	SRR328063
	A8-A0AB	SRR328139
Yes	A8-A09T	SRR328112
	A8-A09V	SRR328108
	A8-A09W	SRR328109
	AO-A0J8	SRR327880
	AO-A0J9	SRR327881
	AO-A0JJ	SRR328028
	AO-A12E	SRR328055
	AO-A12G	SRR327840
	B6-A0IH	SRR328047
	B6-A0IP	SRR327977
	B6-A0RQ	SRR327904
	BH-A0DP	SRR327893
	BH-A0HP	SRR327733
	E2-A10F	SRR327963
	A1-A0SK	SRR327996
	A2-A0CM	SRR328209
	A2-A0D0	SRR328227
	A2-A0D2	SRR328315
	A2-A0T0	SRR327758
	A2-A0T2	SRR327779
	A7-A0DA	SRR327626
Yes	A8-A07C	SRR328292
	A8-A08R	SRR328175
	A8-A09X	SRR328110
	AN-A0AL	SRR328136
	AN-A04D	SRR328190
	AO-A0J4	SRR327950
	AO-A0J6	SRR327878
	AO-A0JL	SRR328029
	AO-A03U	SRR328023
	AO-A12F	SRR327839
	AO-A124	SRR327953
	AO-A129	SRR327851
	AQ-A04J	SRR328105
	AR-A0TS	SRR328058
	AR-A0U1	SRR328060
	AR-A0U4	SRR327911
	BH-A0B3	SRR327933
	BH-A0E0	SRR327967
	BH-A0RX	SRR327775
	D8-A142	SRR327957
	DB-A147	SRR328033
	E2-A1SO	SRR327824
	E2-A14R	SRR327964
	E2-A14X	SRR327890

## Sheet: KIRP
Outlier	Sample	Run
	AL-3466	SRR325265
	AL-3467	SRR325266
	AL-3468	SRR325267
	AL-3471	SRR325268
	AL-3472	SRR327337
	B3-3925	SRR328485
	B3-3926	SRR325223
	B3-4103	SRR325201
	B3-4104	SRR328458
	B9-4113	SRR328460
	B9-4114	SRR328456
	B9-4115	SRR327336
	B9-4116	SRR327930
	B9-4117	SRR328457
	B9-4617	SRR328459

## Sheet: LUAD
Outlier	Sample	Run
		SRR327860
		SRR327861
		SRR328236
		SRR328239
		SRR328240
		SRR328266
		SRR328267
		SRR328268
		SRR328269
		SRR328295
		SRR328296
		SRR328297
		SRR328300
		SRR328301
		SRR328327
		SRR328328
		SRR328329
		SRR328330

## Sheet: LUSC
Outlier	Sample	Run
	66-2789	SRR327853
	66-2790	SRR327854
	66-2791	SRR327855
	66-2788	SRR327873
	66-2792	SRR327920
	18-5595	SRR327927
	66-2781	SRR327944
	66-2786	SRR327945
	66-2778	SRR328020
	18-5592	SRR328076
	66-2780	SRR328091
	66-2782	SRR328092
	21-1070	SRR328119
	21-1071	SRR328120
	21-1072	SRR328121
	21-1075	SRR328122
	66-2795	SRR328144
	18-4086	SRR328149
	21-1076	SRR328150
	21-1078	SRR328151
	66-2794	SRR328173
	66-2800	SRR328174
	21-1076	SRR328179
	21-1077	SRR328180
	66-2777	SRR328196
	66-2783	SRR328197
	66-2787	SRR328198
	66-2793	SRR328199
	21-1079	SRR328205
	66-2773	SRR328226
	18-4321	SRR328237
	18-4315	SRR328265
	18-4083	SRR328270
	66-2771	SRR328286
	18-4319	SRR328298
	18-4316	SRR328299
	18-4314	SRR328322
	18-4312	SRR328323

## Sheet: READ
Outlier	Sample	Run
	AF-2691	SRR305187
	AG-3890	SRR305988
	AG-3599	SRR305991
	AG-3602	SRR305993
	AG-3608	SRR305994
	AG-4015	SRR305996
	AG-A014	SRR305997
	AG-A016	SRR305998
	AG-3609	SRR306022
	AG-3611	SRR306023
	AG-3612	SRR306024
	AG-A01L	SRR306026
	AG-3892	SRR306044
	AG-3598	SRR306047
	AG-3601	SRR306048
	AG-3605	SRR306049
	AG-A002	SRR306051
	AG-A011	SRR306052
	AG-A015	SRR306053
	AG-3887	SRR306072
	AG-3600	SRR306073
	AG-A008	SRR306077
	AG-A00C	SRR306078
	AG-A00H	SRR306079
	AG-A00Y	SRR306080
	AG-4008	SRR306081
	AG-4007	SRR306082
	AG-4005	SRR306083
	AG-4001	SRR306084
	AG-3578	SRR306085
	AG-3580	SRR306086
	AG-3896	SRR306087
	AG-3894	SRR306088
	AG-3893	SRR306089
	AF-2692	SRR306090
	AG-A02X	SRR306091
	AG-3909	SRR306092
	AG-3898	SRR306093
	AF-3400	SRR306094
	AG-3574	SRR306095
	AG-3999	SRR306096
	AG-3901	SRR306097
	AF-3913	SRR306098
	AG-3575	SRR306099
	AG-A01W	SRR317074
	AG-A01Y	SRR317077
	AG-A020	SRR317078
	AG-A026	SRR317079
Yes	AG-A036	SRR317080
Yes	AG-A02N	SRR317081
