# Supplementary material for: Microbial Contamination in Next Generation Sequencing: Implications for Sequence-Based Analysis of Clinical Samples
Source: PLoS Pathog. 2014 Nov 20;10(11):e1004437. doi: 10.1371/journal.ppat.1004437 (PMC4239086; doi:10.1371/journal.ppat.1004437)
Supplement: File S3 — CRC normal and tumor dataset. (XLS) [file ppat.1004437.s012.xls]

## Sheet: Data
Sample	Type	Sample #	Run #	Machine Type
HS1904	N1	SRS242521	SRR317088	Illumina Genome Analyzer II
HS1928	T1	SRS242533	SRR317107	Illumina Genome Analyzer II
HS1905	N2	SRS242522	SRR317094	Illumina Genome Analyzer II
HS1929	T2	SRS242534	SRR317105	Illumina Genome Analyzer II
HS1906	N3	SRS242523	SRR317097	Illumina Genome Analyzer II
HS1930	T3	SRS242535	SRR317108	Illumina Genome Analyzer II
HS1907	N4	SRS242524	SRR317089	Illumina Genome Analyzer II
HS1931	T4	SRS242536	SRR317101	Illumina Genome Analyzer II
HS1908	N5	SRS242525	SRR317092	Illumina Genome Analyzer II
HS1932	T5	SRS242537	SRR317104	Illumina Genome Analyzer II
HS1921	N6	SRS242526	SRR317091	Illumina Genome Analyzer II
HS1933	T6	SRS242538	SRR317102	Illumina Genome Analyzer II
HS1922	N7	SRS242527	SRR317087	Illumina Genome Analyzer II
HS1934	T7	SRS242539	SRR317099	Illumina Genome Analyzer II
HS1923	N8	SRS242528	SRR317090	Illumina Genome Analyzer II
HS1935	T8	SRS242540	SRR317100	Illumina Genome Analyzer II
HS1924	N9	SRS242529	SRR317095	Illumina Genome Analyzer II
HS1936	T9	SRS242541	SRR317109	Illumina Genome Analyzer II
HS1925	N10	SRS242530	SRR317096	Illumina Genome Analyzer II
HS1937	T10	SRS242542	SRR317103	Illumina Genome Analyzer II
HS1926	N11	SRS242531	SRR317093	Illumina Genome Analyzer II
HS1938	T11	SRS242543	SRR317106	Illumina Genome Analyzer II
HS1927	N12	SRS242532	SRR317086	Illumina Genome Analyzer II
HS1939	T12	SRS242544	SRR317098	Illumina Genome Analyzer II
WGS A04175		SRS242520	SRR317085	Hi-seq 2000
WGS A04174		SRS242519	SRR317084	Hi-seq 2000
